# Supplementary material for: Not All Types of Secondary Organic Aerosol Mix: Two Phases Observed When Mixing Different Secondary Organic Aerosol Types
Source: Copernicus journal article supplement (doi:10.5194/acp-2022-331), 2022-06-10
Supplement: Supplementary file 1 [file acp-2022-331-supplement.pdf]

## Not All Types of Secondary Organic Aerosol Mix: Two Phases Observed When Mixing Different Secondary Organic Aerosol Types

Fabian Mahrt<sup>1,2</sup>, Long Peng<sup>1,3</sup>, Julia Zaks<sup>1</sup>, Yuanzhou Huang<sup>1,†</sup>, Paul E. Ohno<sup>4,5</sup>, Natalie R. Smith<sup>6</sup>, Florence K.A. Gregson<sup>1</sup>, Yiming Qin<sup>4,§</sup>, Celia L. Faiola<sup>6</sup>, Scot T. Martin<sup>4,7</sup>, Sergey A. Nizkorodov<sup>6</sup>, Markus Ammann<sup>2</sup> and Allan K. Bertram<sup>1,\*</sup>

<sup>1</sup>Department of Chemistry, University of British Columbia, 2036 Main Mall, Vancouver, BC, V6T1Z1 Canada

<sup>2</sup>Laboratory of Environmental Chemistry, Paul Scherrer Institute, 5232 Villigen, Switzerland

<sup>3</sup>Institute for Environmental and Climate Research, Jinan University, Guangzhou 511443, China

<sup>4</sup>John A. Paulson School of Engineering and Applied Sciences, Harvard University, Cambridge, MA 02138, USA

<sup>5</sup>Center for the Environment, Harvard University, Cambridge, MA 02138, USA

<sup>6</sup>Department of Chemistry, University of California, Irvine, Irvine, CA 92697, USA.

<sup>7</sup>Department of Earth and Planetary Sciences, Harvard University, Cambridge, MA 02138, USA

<sup>†</sup>Now at: Anton Paar Canada Inc., 4920 Place Olivia, H4R 2Z8 Saint Laurent, Canada

<sup>§</sup>Now at: Department of Chemistry, University of California, Irvine, CA 92697-2025, USA

*Correspondence to:* Allan K. Bertram (bertram@chem.ubc.ca)

### **This file includes:**

Tables S1 to S7

Figure S1 to S12

References

25 **S1 Summary of previous studies**

26 **1.1 Overview of results from previous studies that mixed one SOA type generated in environmental reac-**  
 27 **tors with a commercial, single-component SOA proxy**

28 **Table S1:** Summary of previous studies that investigated the miscibility of SOA mixtures, where a SOA material was produced  
 29 in an environmental reactor from ozonolysis of  $\alpha$ -pinene and mixed with a commercial, single-component SOA proxy. Indi-  
 30 cated are the SOA types, the relative humidity (RH) at which the experiment was performed, and whether mixing was reported  
 31 or not. The O/C ratio listed for the  $\alpha$ -pinene SOA material is based on Canagaratna et al. (2015). N/A indicates not available.

| SOA <sub>1</sub> (O/C)                | SOA <sub>2</sub> (O/C)<br>(Proxy)  | RH<br>value or<br>range | Mixing ob-<br>served | Extent of mixing<br>observed   | Reference               |
|---------------------------------------|------------------------------------|-------------------------|----------------------|--------------------------------|-------------------------|
| $\alpha$ -pinene ozonolysis<br>(0.41) | Glycerol (1.0)                     | 12%                     | Yes                  | 1-phase particles <sup>f</sup> | Gorkowski et al. (2020) |
| $\alpha$ -pinene ozonolysis<br>(0.41) | Glycerol (1.0)                     | 73%                     | No                   | 2-phase particles <sup>f</sup> | Gorkowski et al. (2017) |
| $\alpha$ -pinene ozonolysis<br>(0.41) | Erythritol<br>(1.0)                | 55% to<br>65%           | No*                  | N/A                            | Gordon et al. (2016)    |
| $\alpha$ -pinene ozonolysis<br>(0.41) | Tetraethylene<br>glycol (0.625)    | 55% to<br>65%           | Yes <sup>*a</sup>    | N/A                            | Gordon et al. (2016)    |
| $\alpha$ -pinene ozonolysis<br>(0.41) | Adipic acid<br>(0.66)              | 2%                      | No <sup>s</sup>      | N/A                            | Song et al. (2011)      |
| $\alpha$ -pinene ozonolysis<br>(0.41) | Fulvic acid<br>(0.76) <sup>b</sup> | 2%                      | No <sup>s</sup>      | N/A                            | Song et al. (2011)      |
| $\alpha$ -pinene ozonolysis<br>(0.41) | Citric acid<br>(1.16)              | 2%                      | Yes <sup>s</sup>     | N/A                            | Song et al. (2011)      |
| $\alpha$ -pinene ozonolysis<br>(0.41) | Adipic acid<br>(0.66)              | 60%                     | No <sup>s</sup>      | N/A                            | Song et al. (2011)      |
| $\alpha$ -pinene ozonolysis<br>(0.41) | Fulvic acid<br>(0.76) <sup>b</sup> | 60%                     | No <sup>s</sup>      | N/A                            | Song et al. (2011)      |
| $\alpha$ -pinene ozonolysis<br>(0.41) | Citric acid<br>(1.16)              | 60%                     | Yes <sup>s,c</sup>   | N/A                            | Song et al. (2011)      |
| $\alpha$ -pinene ozonolysis<br>(0.41) | Tetraethylene<br>glycol (0.625)    | < 20%                   | Yes*                 | N/A                            | Ye et al. (2016a)       |
| $\alpha$ -pinene ozonolysis<br>(0.41) | Levoglucosan<br>(0.83)             | < 20%                   | No*                  | N/A                            | Ye et al. (2016a)       |
| $\alpha$ -pinene ozonolysis<br>(0.41) | Erythriol (1.0)                    | < 20%                   | No*                  | N/A                            | Ye et al. (2016a)       |
| $\alpha$ -pinene ozonolysis<br>(0.41) | Citric acid<br>(1.16)              | < 20%                   | Yes*                 | N/A                            | Ye et al. (2016a)       |
| $\alpha$ -pinene ozonolysis<br>(0.41) | Tetraethylene<br>glycol (0.625)    | 55% to<br>60%           | Yes*                 | N/A                            | Ye et al. (2016a)       |
| $\alpha$ -pinene ozonolysis<br>(0.41) | Erythriol (1.0)                    | 55% to<br>60%           | No*                  | N/A                            | Ye et al. (2016a)       |
| $\alpha$ -pinene ozonolysis<br>(0.41) | Levoglucosan<br>(0.83)             | 2% to<br>5%             | No <sup>s</sup>      | N/A                            | Ye et al. (2016a)       |
| $\alpha$ -pinene ozonolysis<br>(0.41) | Erythriol (1.0)                    | 2% to<br>5%             | No <sup>s</sup>      | N/A                            | Ye et al. (2016a)       |

32 \*flow tube experiment; <sup>s</sup>chamber experiment; <sup>f</sup>aerosol optical tweezer; <sup>a</sup>Mixing (mass enhancement) was only found for tetra-  
 33 ethylene glycol concentrations  $\geq 80 \mu\text{g m}^{-3}$ ; <sup>b</sup>Based on Rice and MacCarthy (1991); <sup>c</sup> Mixing (mass enhancement) was only  
 34 found for  $\alpha$ -pinene concentrations  $\geq 95 \mu\text{g m}^{-3}$

35 **1.2 Overview of results from previous studies that mixed two SOA types generated in environmental reac-**  
 36 **tors**

37 **Table S2:** Summary of previous studies that investigated the miscibility of SOA mixtures, where both SOA types were pro-  
 38 duced in environmental reactors. Indicated are the SOA types, the relative humidity (RH) at which the experiment was per-  
 39 formed, and whether mixing was reported or not. N/A indicates not available.

| SOA <sub>1</sub> (O/C)                                   | SOA <sub>2</sub> (O/C)                                                             | RH value or range | Mixing observed  | Onset and/or extent of mixing observed | Reference                 |
|----------------------------------------------------------|------------------------------------------------------------------------------------|-------------------|------------------|----------------------------------------|---------------------------|
| Toluene-D <sub>8</sub> /OH (0.85) <sup>#</sup>           | α-pinene/O <sub>3</sub> (0.41) <sup>#</sup>                                        | < 5%              | Yes <sup>§</sup> | N/A                                    | Robinson et al. (2013)    |
| Toluene/OH (0.85) <sup>#</sup>                           | α-pinene/O <sub>3</sub> (0.41) <sup>#</sup>                                        | 17% to 32%        | Yes <sup>§</sup> | N/A                                    | Hildebrandt et al. (2011) |
| Isoprene/OH (photooxidation products, 0.85) <sup>#</sup> | α-pinene/OH (0.41) <sup>#</sup>                                                    | 50%               | Yes <sup>§</sup> | N/A                                    | Dommen et al. (2009)      |
| Toluene-D <sub>8</sub> /OH (0.6)                         | α-pinene /O <sub>3</sub> ; prepared in excess O <sub>3</sub> ; (0.41) <sup>#</sup> | ~7% to ~85%       | Yes <sup>§</sup> | Mixing observed for RH > 20%           | Ye et al. (2016b)         |
| Isoprene/O <sub>3</sub> (0.55)                           | Toluene-D <sub>8</sub> /OH (0.48)                                                  | ~10%              | Yes <sup>§</sup> | 28%±2% (RH < 10%)                      | Ye et al. (2018b)         |
| Limonene/O <sub>3</sub> (0.43)                           | α-pinene-D <sub>6</sub> /D <sub>3</sub> /O <sub>3</sub> (0.30)                     | ~10% to 30%       | Yes <sup>§</sup> | ~15% (RH < 10%)<br>~20% RH > 30%)      | Ye et al. (2018b)         |
| Limonene/O <sub>3</sub> (0.43)                           | Toluene-D <sub>8</sub> /OH (0.45)                                                  | ~10% to ~30%      | Yes <sup>§</sup> | 25%±2% (RH < 10%)<br>30%±1% (RH > 30%) | Ye et al. (2018b)         |
| β-caryophyllene/O <sub>3</sub> (0.29)                    | α-pinene-D <sub>6</sub> /O <sub>3</sub> (0.30)                                     | ~10% to ~75%      | Yes <sup>§</sup> | ~5% (RH < 10%)<br>~10% (RH > 30%)      | Ye et al. (2018b)         |
| β-caryophyllene/O <sub>3</sub> (0.31)                    | Toluene-D <sub>8</sub> /OH (0.48)                                                  | ~10% to ~50%      | Yes <sup>§</sup> | ~5% (RH < 10%)<br>~10% (RH > 30%)      | Ye et al. (2018b)         |

40 <sup>#</sup>Based on Canagaratna et al. (2015)(Canagaratna et al., 2015); \*flow tube experiment; <sup>§</sup>chamber experiment

## 41 S2 Method of generating internal SOA+SOA mixtures

### 42 S2.1 Experimental setups and conditions used to generate SOA types in consecutive generation and impac- 43 tion experiments.

44 The majority (12 out of 15) of the SOA+SOA mixtures studied here was prepared using the consecutive generation  
45 and impaction method. After generation of a given SOA type in one of the reactors, and prior to impaction of  
46 another SOA type on top of the hydrophobic glass slides, the SOA samples were stored in air-sealed containers in  
47 a freezer at -20 °C, to minimize evaporative loss and potential condensed phase reactions of the SOA material.  
48 Most SOA containing glass slides were used within ~3 weeks of sample storage. Using the mixture of catechol  
49 SOA deposited on top of  $\beta$ -caryophyllene, we verified that the phase behavior was similar between freshly depos-  
50 ited  $\beta$ -caryophyllene SOA and slides of  $\beta$ -caryophyllene SOA that had been frozen for 3 weeks.

51 For consecutive generation and impaction experiments different types of reactors have been used to generate the  
52 different SOA types, namely the University of British Columbia environmental chamber (UBC-EC), the Univer-  
53 sity of British Columbia oxidation flow reactor (UBC-OFR) and the Harvard University oxidation flow reactor  
54 (HU-OFR). An overview of the reactors and the experimental conditions used to generate each of the SOA types  
55 is given in Table S3. Details for each reactor are described below.

56 **Table S3.** Overview of the reactor types, particle mass concentration and average elemental oxygen-to-carbon (O/C) and hy-  
57 drogen-to-carbon (H/C) ratio of the individual SOA types studied here and used to generate internally mixed SOA+SOA par-  
58 ticles using the consecutive generation and impaction method. Each combination of two SOA types was studied. See Table 1  
59 of main text for the number of phases observed for each mixture. For the O/C and the H/C ratios the average value is given  
60 along with the uncertainty (12% and 4% relative error for O/C and H/C ratios), associated with the improved ambient method  
61 applied to a multi-species organic mixture ( $\geq 25$  species), used for AMS data analysis (Canagaratna et al., 2015). Also indicated  
62 in parenthesis is the range over which the average O/C and H/C ratios varied on a day-to-day basis. MOSSI denotes multi-  
63 orifice single stage impactor and SKC denotes Sioutas cascade (slit) impactor.

| SOA type                              | Reactor | Mass concen-<br>tration / $\mu\text{g m}^{-3}$ | Collection time<br>and method | O/C                                            | H/C                                            |
|---------------------------------------|---------|------------------------------------------------|-------------------------------|------------------------------------------------|------------------------------------------------|
| Valencene/O <sub>3</sub>              | UBC-OFR | 60–120                                         | 22–26 h<br>MOSSI or SKC       | 0.34 $\pm$ 0.04<br>(0.31 to 0.38)              | 1.53 $\pm$ 0.06<br>(1.43 to 1.57)              |
| $\beta$ -caryophyllene/O <sub>3</sub> | UBC-EC  | 33–55                                          | 22–26 h<br>MOSSI or SKC       | 0.40 $\pm$ 0.05<br>(0.32 to 0.47)              | 1.55 $\pm$ 0.06<br>(1.46 to 1.63)              |
| Farnesene/O <sub>3</sub>              | UBC-OFR | 60–100                                         | 22–26 h<br>MOSSI or SKC       | 0.41 $\pm$ 0.05<br>(0.38 to 0.45)              | 1.53 $\pm$ 0.06<br>(1.48 to 1.6)               |
| $\alpha$ -pinene/O <sub>3</sub>       | UBC-EC  | 22–37                                          | 22–26 h<br>MOSSI or SKC       | 0.50 $\pm$ 0.06<br>(0.47 to 0.53)              | 1.62 $\pm$ 0.06<br>(1.57 to 1.66)              |
| Catechol/O <sub>3</sub>               | UBC-EC  | 18–70                                          | 22–26 h<br>MOSSI or SKC       | 0.88 $\pm$ 0.11<br>(0.81 to 0.94)              | 1.21 $\pm$ 0.05<br>(1.14 to 1.28)              |
| Toluene/OH                            | HU-OFR  | 20–40                                          | 22–26 h<br>MOSSI or SKC       | 1.05 <sup>†</sup> $\pm$ 0.13<br>(0.73 to 1.29) | 1.44 <sup>†</sup> $\pm$ 0.09<br>(1.35 to 1.69) |

64 <sup>†</sup> Values based on sampling washed-off and re-aerosolized SOA particles from aqueous solution; Section S5.

65

66 **UBC-EC:** The environmental chamber at UBC is a 1.8 m<sup>3</sup> continuous flow chamber that has been described in  
67 detail previously (Maclean et al., 2021; Huang et al., 2021), and that is similar to other continuous flow environ-  
68 mental chambers (King et al., 2009; Shilling et al., 2008; Zhang et al., 2018). Within the environmental chamber,  
69 SOA was generated by dark ozonolysis of  $\alpha$ -pinene (Sigma Aldrich, 98% purity),  $\beta$ -caryophyllene (Sigma Aldrich,  
70  $\geq 98\%$  purity) or catechol (Sigma Aldrich,  $\geq 99\%$  purity). For all experiments ozone (O<sub>3</sub>) was generated outside  
71 the chamber by flowing a dry (RH  $\leq 1.5\%$ ), particle- and hydrocarbon-free air stream (1.75 L min<sup>-1</sup>) from a zero-  
72 air generator (Aadco, model: 737) over a pen-ray style UV-lamp ( $\lambda_{\text{mode}} = 253.7$  nm; Jelight, model: 610). Mixtures  
73 of 2 wt% of each volatile organic compound (VOC) in 2-butanol (Sigma-Aldrich,  $\geq 99\%$  purity) were prepared,  
74 separately for each SOA precursor. The 2-butanol serves as a scavenger for hydroxyl radicals (OH), which can be  
75 formed as a by-product in alkene-ozone reactions (Kroll et al., 2002; Paulson et al., 1999). We used a scavenger  
76 in all our experiments where SOA was produced from oxidation by O<sub>3</sub> to minimizing the impact of reactions of  
77 the SOA precursor with OH radicals, allowing us to largely isolate SOA formation from ozonolysis. Previous  
78 studies have shown that the reaction of the scavenger with the OH radicals does not contribute to SOA formation,  
79 while it can impact the ability of the gaseous SOA precursor to form SOA, i.e., the aerosol mass yield (Docherty  
80 and Ziemann, 2003; Keywood et al., 2004). A syringe pump (Pump: Cole-Palmer, model: 100, Syringe: Hamilton,

81 100-Series Gastight) was used to feed the solution of 2-butanol and the VOC into a gently heated (~318 K), round-  
82 bottom glass flask, where the organic liquid was vaporized, and carried into the environmental chamber by con-  
83 tinuously flushing the glass flask with zero air using a flow rate of 17.5 L min<sup>-1</sup>. All flows were held constant  
84 throughout an experiment, and controlled by mass flow controllers (MFC, Omega, model: FMA5400/550 A Se-  
85 ries), resulting in an average residence time for the gases and particles of approximately 1.6 h within the environ-  
86 mental chamber. Syringe pump injection rates of 30 μl h<sup>-1</sup> for each VOC and 2-butanol solution were used. This  
87 resulted in SOA mass loadings within the environmental chamber between approximately 18 to 100 μg m<sup>-3</sup>, meas-  
88 ured with an optical particle counter (OPC, Grimm, model: 11-S; optical flow rate: 1.2 L min<sup>-1</sup>, size range 0.25–  
89 32 μm), that was used to periodically sampling air from the chamber throughout an experiment (TableS3). Ozone  
90 concentrations were continuously measured at the exit of the chamber using an O<sub>3</sub> monitor (ThermoScientific,  
91 model: 49i), with O<sub>3</sub> being in excess by approximately 300–380 ppb<sub>v</sub> for all UBC-EC experiments using the con-  
92 secutive generation and impaction method.

93 At the exit of the environmental chamber, the SOA particles were collected onto plain glass slides (12 mm diam-  
94 eter, Hampton Research, HR3-209T and ORSAtec GmbH, customized order) that were made hydrophobic through  
95 coating with either fluoropel-800 (Cytonix) or with Trichloro(1H,1H,2H,2H-perfluorooctyl)silane (Sigma Aldrich,  
96 97% purity), to achieve a high contact angle between the glass substrate and the SOA particles. To collect SOA  
97 material for phase behavior analysis, chamber air was continuously sampled (10–12 L min<sup>-1</sup>) over a period of  
98 approximately 22 h to 26 h, using either a multi-orifice single stage impactor with a 50% cut-off diameter of ~0.18  
99 μm (MOSSI, MSP Corporation), or a slit impactor with a 50% cut-off diameter of ~0.25 μm (SKC, Sioutas Cas-  
100 cade Impactor).

101 **UBC-OFR:** Also used for sample generation was a 22 L volume oxidation flow reactor available at UBC to gen-  
102 erate SOA material from ozonolysis of farnesene (Sigma Aldrich, mixture of isomers) and valencene (Sigma Al-  
103 drich, ≥ 65% purity). As in the case of the UBC-EC, O<sub>3</sub> was generated outside the UBC-OFR by passing a constant  
104 flow (2.0 L min<sup>-1</sup>; MFC: Omega, model: FMA5400/550 A Series) of zero air over a pen-ray style UV-lamp (Jelight,  
105 model: 610) and adding it into the OFR. The output oxidant concentration of the O<sub>3</sub> generator can be varied by  
106 adjusting the flow rate and the sleeve length over the UV-lamp. Here the flow rate was kept constant in all our  
107 experiments and the sleeve length was adjusted to achieve O<sub>3</sub> concentrations of approximately 2300 ppb and 6500  
108 ppb for the generation of farnesene and valencene SOA material, respectively, as periodically measured with an  
109 O<sub>3</sub> detector (2B Technologies, model: 202) at the exit (after the reaction) of the UBC-OFR. The VOC solutions (2  
110 wt%) were prepared in 2-butanol and added to a gently heated (~318 K) glass bulb, using a syringe pump (Pump:  
111 Chemxy Inc., model: Fusion 101, Syringe: Hamilton, 1000-Series Gastight) with injection rates of 20 μl hr<sup>-1</sup> for  
112 both the farnesene and valencene solutions. Within the heated glass bulb, the organic solutions were vaporized,  
113 and carried into the chamber by flushing the glass bulb with zero air. Flow rates of 3 L min<sup>-1</sup> and 2 L min<sup>-1</sup> were  
114 used in the case of farnesene and valencene, respectively, as controlled by a MFC (MKS, Legacy-Series). The  
115 total flow rates through the UBC-OFR were 5 L min<sup>-1</sup> and 4 L min<sup>-1</sup>, resulting in residence times in the OFR of  
116 around 260 s and 330 s for the farnesene and valencene experiments, respectively. Lower flow rates through the  
117 OFR in the case of valencene as compared to farnesene oxidation were used due to its slower reaction with O<sub>3</sub> (Kim  
118 et al., 2011; Yee et al., 2018), to allow for sufficient SOA generation during the residence time. The SOA particle  
119 mass concentrations within the OFR were measured with an OPC, and typically ranged between approximately 60  
120 μg m<sup>-3</sup> to 100 μg m<sup>-3</sup> (farnesene SOA) and approximately 80 μg m<sup>-3</sup> to 100 μg m<sup>-3</sup> (valencene SOA) for our  
121 experimental conditions (Table S3). At the exit of the UBC-OFR, the particles were collecting onto hydrophobic  
122 glass slides using either a multi-orifice single stage or a slit impactor, identical to the case of the EC-UBC sampling  
123 (see above), operated at a flow rate of ~10 L min<sup>-1</sup>. Since the flow rates needed for the impactor was larger than  
124 the total flow rate from the outlet of the OFR-UBC (4–5 L min<sup>-1</sup>), the air flow at the outlet of the OFR containing  
125 the SOA particles was sheathed with filtered (Pall Corporation, HEPA) particle-free, ambient air prior to collection  
126 with the impactor. Typical SOA material collection times were approximately 22 h to 26 h.

127 **HU-OFR:** Toluene derived SOA material was produced by photooxidation of toluene vapors in an OFR at Harvard  
128 University. The HU-OFR has been described in detail elsewhere (Liu et al., 2015). In brief, OH radicals were  
129 produced within the HU-OFR by photodissociation of O<sub>3</sub>, followed by the reaction of the resulting excited atomic  
130 oxygen with water vapor. The O<sub>3</sub> concentration within the OFR was around ~20 ppm<sub>v</sub> and the RH was 40% for  
131 our experiments. The toluene (Sigma Aldrich, ≥ 99.5% purity) was injected into a glass flask held at room tem-  
132 perature (~293 K) using a syringe pump (Chemyx Inc., model: Fusion 200), and from there flushed into the HU-  
133 OFR. The resulting SOA mass loadings in the OFR were typically between 20 μg m<sup>-3</sup> to 40 μg m<sup>-3</sup>, as determined  
134 from the size distribution measured with a scanning mobility particle sizer (SMPS, TSI Inc., differential mobility  
135 analyzer model 3081, condensation particle counter model 3010, aerosol-to-sheath flow ratio: 5:1, particle electric  
136 mobility diameter range: 10–530 nm) and assuming ρ = 1200 kg m<sup>-3</sup> for the material density (Shilling et al., 2008).  
137 The total volumetric flow rate through the HU-OFR was 7 L min<sup>-1</sup>, resulting in a particle residence time of 110  
138 s (Liu et al., 2015). Toluene SOA material was collected onto hydrophobic glass slides using a custom-built single-

139 stage impactor (Song et al., 2017), by continuously sampling air from the HU-OFR at a flow rate of 3 L min<sup>-1</sup>,  
140 over a period of approximately 22 h to 26 h.

## 141 S2.2 Experimental setup and conditions used to generate SOA in simultaneous generation and impaction 142 experiments.

143 A handful (3 out of 15) of the SOA+SOA mixtures studied here were prepared in the UBC-EC, using the simulta-  
144 neous generation and impaction method. Specifically, the simultaneous generation and impaction method was used  
145 for mixtures of  $\alpha$ -pinene/O<sub>3</sub>+catechol/O<sub>3</sub>,  $\beta$ -caryophyllene/O<sub>3</sub>+catechol/O<sub>3</sub> and  $\alpha$ -pinene/O<sub>3</sub>+ $\beta$ -caryophyllene/O<sub>3</sub>  
146 (Table 1). For these experiments two different SOA precursors were simultaneously added to and simultaneously  
147 oxidized by ozonolysis within the UBC-EC. Overall, the experimental setup and instrumentation used was similar  
148 to that described in Section S2.1 when the UBC-EC was used to generate SOA material from a single VOC. In  
149 order to add and oxidize two different VOC types simultaneously to the UBC-EC two independent sets of a syringe  
150 pumps and a heated (~318 K) glass flask were used. Each syringe pump (Pump: Cole-Palmer, model: 100 or Pump:  
151 Cole-Palmer, model: Masterflex 78-0100C) was used to add a 2 wt% VOC solution in 2-butanol into a heated  
152 glass flask. The two heated glass flasks were coupled in series upstream of the UBC-EC. Thus, the VOC vapors  
153 from the first flask were flushed through the second flask, and from there the combined organic vapors were carried  
154 into the environmental chamber, using dry (< 1.5% RH) air from a zero-air generator (Aadco, model: 737) and a  
155 flow rate of 17.5 L min<sup>-1</sup>, controlled by a mass flow controller, as described in Section S1. Syringe pump injection  
156 rates of 30  $\mu$ l h<sup>-1</sup> for each VOC and 2-butanol solution were used for all simultaneous generation and impaction  
157 experiments. Ozone was added to the UBC-EC in an identical fashion as for the consecutive impaction and gen-  
158 eration experiments, using a pen-style UV lamp (Jelight, model: 610), flushed with zero-air at a rate of 1.75 L min<sup>-1</sup>.  
159 The O<sub>3</sub> concentration was continuously measured at the exit of the UBC-EC using an O<sub>3</sub> monitor (ThermoSci-  
160 entific, model: 49i), with O<sub>3</sub> being in excess by approximately 250–300 ppb<sub>v</sub> for all experiments when two VOCs  
161 were added to the UBC-EC. The SOA mass loadings within the UBC-EC for the simultaneous generation and  
162 impaction experiments were around 90  $\mu$ g m<sup>-3</sup>, as measured with an OPC (Grimm, model: 11-S).

163 To estimate the individual contribution of each individual SOA type to the total organic particle mass concentra-  
164 tions when both SOA types were present within the UBC-EC, the simultaneous generation and impaction experi-  
165 ments were carried out as follows, and as schematically depicted in Fig. S1: At the beginning of each experiment,  
166 only one VOC was injected into the UBC-EC, until the organic mass concentration reached a steady state, as  
167 monitored with the OPC. After a steady state had been reached, the injection of the second VOC was started at  
168 time  $t_1$ , causing an overall increase in total aerosol mass within the chamber, resulting from the additional oxidation  
169 and SOA formation of the second VOC. After some time  $t_2$  the overall organic mass concentration approached a  
170 new steady state, with contributions of both VOCs becoming simultaneously oxidized and forming SOA particles.  
171 Only samples collected during this period, i.e., when both SOA types were simultaneously injected and oxidized,  
172 and a steady-state mass loading had been reached, were used for phase behavior analysis of SOA+SOA mixtures  
173 generated by the simultaneous generation and impaction method. Lastly, the injection of the first VOC was stopped  
174 at time  $t_3$ , and the total mass loading decreased to a new steady state after time  $t_4$ . The average organic mass  
175 concentrations when only either one of the SOA types was present within the chamber were then used to estimate  
176 the contributions of the two SOA types to the total mass of a SOA+SOA mixtures and to estimate a SOA-to-SOA  
177 mass mixing ratio (see below). The average total organic mass concentrations along with the mass concentrations  
178 of the individual SOA types before and after each simultaneous generation and impaction experiment are summa-  
179 rized in Table S4.

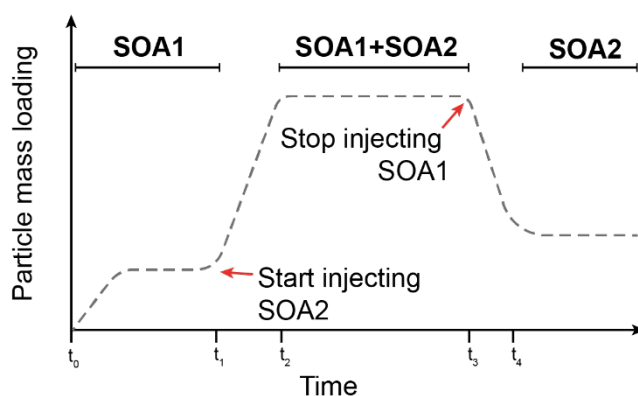

180  
181 **Figure S1:** Schematic illustration of the temporal evolution of particle mass loading during experiments when two SOA types  
182 were simultaneously generated in the UBC-EC and simultaneously impacted to produce SOA+SOA particles.

183 **Table S4.** Overview of the SOA+SOA mixtures prepared using the simultaneous generation and impaction method along with  
 184 particle mass loadings. For these experiments the UBC-EC was used. We assume the average elemental O/C and H/C ratios of  
 185 the different SOA types to be the same as in the experiments using the consecutive generation and impaction method when one  
 186 SOA type was present within the UBC-EC (Table S3). The values in parenthesis indicate the standard error of the mass loading,  
 187 given as two standard deviations.

| Exp. No. | SOA <sub>1</sub>                | SOA <sub>2</sub>                      | Avg. SOA <sub>1</sub> mass concentration / $\mu\text{g m}^{-3}$ | Avg. SOA <sub>2</sub> mass concentration / $\mu\text{g m}^{-3}$ | Avg. mass concentration when both SOA types are present / $\mu\text{g m}^{-3}$ | Collection time and method |
|----------|---------------------------------|---------------------------------------|-----------------------------------------------------------------|-----------------------------------------------------------------|--------------------------------------------------------------------------------|----------------------------|
| 1        | $\alpha$ -pinene/O <sub>3</sub> | $\beta$ -caryophyllene/O <sub>3</sub> | 34 $\pm$ 0.35*                                                  | 43 $\pm$ 7.4                                                    | 89 $\pm$ 7.9                                                                   | 22–26 h<br>MOSSI           |
| 3        | $\alpha$ -pinene/O <sub>3</sub> | Catechol/O <sub>3</sub>               | 41 $\pm$ 14.3                                                   | 41 $\pm$ 14.5                                                   | 91 $\pm$ 22.9                                                                  | 22–26 h<br>MOSSI           |
| 4        | Catechol/O <sub>3</sub>         | $\beta$ -caryophyllene/O <sub>3</sub> | 42 $\pm$ 12.8                                                   | 39 $\pm$ 12.1                                                   | 93 $\pm$ 5.0                                                                   | 22–26 h<br>MOSSI           |

188 \* sampling time for pure  $\alpha$ -pinene SOA was  $\sim$ 10 min

(a) Consecutive impaction

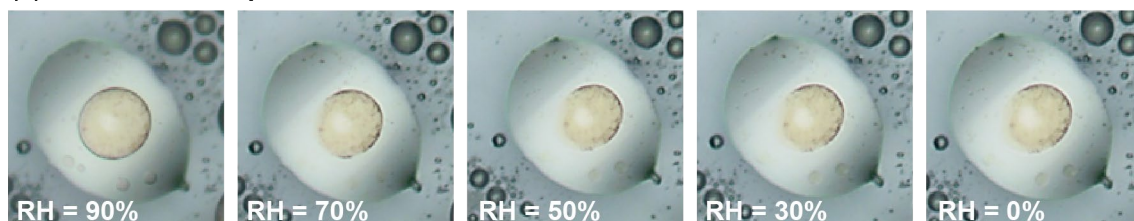

(b) Simultaneous impaction

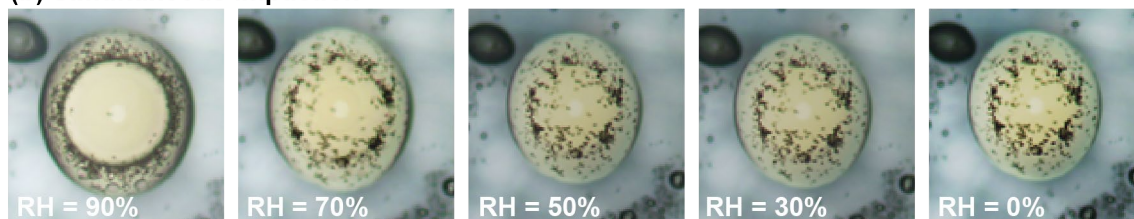

(c) Simultaneous impaction with Nile red nebulized on top

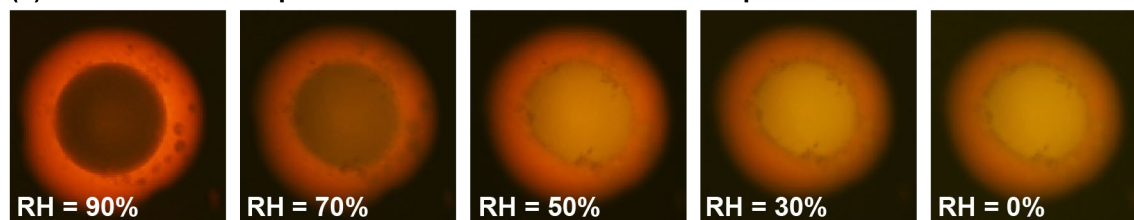

190  
 191 **Figure S2:** Example of effect of collection method on phase behavior of internal SOA+SOA mixtures for particles containing  
 192  $\beta$ -caryophyllene SOA material (O/C = 0.40) and catechol SOA material (O/C = 0.88). (a) Optical microscope images of  $\beta$ -  
 193 caryophyllene SOA material deposited onto glass slide containing previously deposited catechol SOA material. (b) Optical  
 194 microscope images of simultaneously impacted  $\beta$ -caryophyllene SOA material and catechol SOA material from the UBC en-  
 195 vironmental chamber. (c) Fluorescence microscope images of the same sample as in panel (b), but with trace amounts of Nile  
 196 red nebulized on top of SOA+SOA particles.



## 197 S4 Estimation of SOA-to-SOA mixing ratio in internally mixed SOA+SOA particles

198 The ratio of the amount of the different SOA types within internally mixed SOA+SOA particles can impact the  
199 phase behavior. Here, we have used two different approaches to estimate the ratio of the SOA types for mixtures  
200 prepared by the consecutive generation and impaction method and the simultaneous generation and impaction  
201 method, as detailed below.

### 202 S4.1 Estimation of SOA-to-SOA mixing ratio for consecutive generation and impaction method experi- 203 ments

204 In order to estimate the ratio of the different SOA types within individual particles, we assumed that the ratio of  
205 the volumes of the different phases equals the ratio of the different SOA types. Hence, this approach is only appli-  
206 cable for phase-separated particles but cannot be applied to single-phase SOA+SOA particles, and further neglects  
207 partial miscibility between the two SOA types within a mixture. A caveat associated with this approach stems from  
208 assuming absence of yield enhancements between the two SOA types and associated impacts on the mixing ratio.  
209 In other words, the yield enhancement of SOA<sub>1</sub> caused by SOA<sub>2</sub> is assumed to be similar to the yield enhancement  
210 of SOA<sub>2</sub> by SOA<sub>1</sub>. This assumption, although idealized, allowed us to estimate the SOA-to-SOA mixing ratio from  
211 the spatial arrangement of the different SOA phases within internally mixed particles. Here, we used a laser scan-  
212 ning confocal microscope (Zeiss, model: Axio Observer 510 MP) to measure the three-dimensional arrangement  
213 within individual phase-separated SOA+SOA particles. Confocal microscopy enables recording of two-dimen-  
214 sional images of the deposited SOA+SOA particles at different focal depths of the particles. By changing the focal  
215 depth, i.e., scanning the focal plane along the height (z-dimension) of the particles, a series of two-dimensional  
216 images results, that can be combined into so-called z-stacks. From these z-stacks the structure of the SOA+SOA  
217 particles, i.e., the spatial arrangement of the two SOA phases, could be reconstructed for individual particles. For  
218 mixtures that resulted in single phase SOA+SOA particles, the SOA-to-SOA mixing ratio could not be estimated  
219 using confocal microscopy. Nonetheless, given that the same method was used for generating internally mixed  
220 SOA+SOA particles, we assume that the mixing ratios are likely comparable to the values observed for the phase-  
221 separated SOA+SOA particles.

222 For the mixtures produced by the consecutive generation and impaction method and that resulted in phase-sepa-  
223 rated SOA+SOA particles, two main morphologies were observed: i) particles where the outer SOA phase formed  
224 a spherical cap, hereafter referred to as spherical calotte, and the inner SOA phase formed a sphere within the  
225 spherical calotte, ii) particles where the outer SOA phase formed a spherical calotte and the inner SOA phase  
226 formed a cylinder within the spherical calotte.

227 Example confocal microscope images for each of the two morphologies are shown in Fig. S3, along with schemat-  
228 ics illustrating the morphologies.

229 Independent of the morphology of the SOA+SOA particles, the volume of the entire particle was estimated by  
230 assuming a spherical cap-shaped particle, where the volume can be calculated following, e.g., Iwamatsu (2018)  
231 as:

$$V_{SOA+SOA} = \frac{4}{3}\pi R\varphi(\theta_{SOAout,s}), \quad (S1)$$

232 with,

$$\varphi(\theta_{SOAout,s}) = \frac{(2+\cos\theta_{SOAout,s})(1-\cos\theta_{SOAout,s})^2}{4}, \quad (S2)$$

233 where  $\theta_{SOAout,s}$  is the contact angle between the outer SOA phase and the hydrophobic glass slide (schematic in  
234 Fig. S3c and d), that was determined from our confocal microscopy images following established methods (Chesna  
235 et al., 2016). Furthermore,  $R$  denotes the radius of the spherical cap-shaped SOA particle on the flat glass substrate.  
236 The radius of the spherical cap,  $R$ , is related to the radius of the cross-sectional area of the spherical cap with the  
237 glass substrate,  $r_{SOAout}$ , (the radius of the circle when looking at the particle from above, i.e., in the top-down view)  
238 by  $R = r_{SOAout}/\sin\theta_{SOAout,s}$  (schematic in Fig. S3a).

239 While the volume of the entire SOA+SOA particle was always estimated by assuming a spherical-cap morphology  
240 for all our particles, the method to estimate the volume of the inner SOA phase differed depending on the mor-  
241 phology observed in the confocal microscopy images, as illustrated by our schematics shown in Fig. S3.

242 For cases where the inner SOA phase formed a sphere within the spherical calotte (Fig. S3a), the volume of the  
243 inner SOA phase was simply calculated as the volume of a sphere. In cases where multiple spheres were present  
244 within the spherical calotte, the volume of the inner SOA phase was calculated as the sum of the volumes of the  
245 multiple spheres.

246 For cases where the inner SOA phase formed a cylinder (Fig. S3b), extending from the glass substrate all the way  
247 to the surface of the SOA+SOA particle, the volume of the inner SOA phase was approximated by the volume of  
248 a cylinder:

$$V_{SOAin} = \pi r_{SOAin}^2 \cdot h_{SOAin} \quad (S3)$$

249 Here  $h_{SOAin}$  is the height of the cylinder formed by the inner SOA phase, marking the largest vertical extent between  
250 the hydrophobic glass slides and the interface formed by the inner SOA phase and the air (Fig. S3b). We point out  
251 that the contact angle between the inner SOA phase and the hydrophobic glass slides was often a few degrees  
252 larger than  $90^\circ$  (vertical cross sections in Fig. S3b). In these cases, the “tube-like” volume of a perfect cylinder  
253 slightly underestimates the volume of the inner SOA phase, by not capturing the bulges along the height of the  
254 cylinder contributing to the volume of the inner SOA phase. At the same time, the volume of a perfect cylinder  
255 slightly overestimates the volume of the inner phase, by not accounting for the curvature of the interface formed  
256 by the inner SOA phase and the air. In our SOA+SOA particles these effects roughly cancel out, making the  
257 assumption of a cylindrical inner SOA phase a reasonably first order approximation. With the volume of the entire  
258 SOA+SOA particle and the volume of inner SOA phase calculated, the volume of the outer SOA phase was simply  
259 approximated as the difference in these two volumes, ultimately allowing us to estimate the (volume) ratio of the  
260 two SOA phases.

261 For each mixture generated using the consecutive generation and impaction method, which showed phase-sepa-  
262 rated particles, a new hydrophobic glass slide with SOA+SOA particles was prepared in an identical manner as  
263 for the phase behavior analysis and confocal microscopy images were taken to estimate the SOA-to-SOA ratios.  
264 Eight individual SOA+SOA particles were analyzed for each mixture that resulted in phase-separated particles. A  
265 summary of the estimated SOA-to-SOA ratios following this approach is given in Table S5. The type of SOA  
266 material making up the outer and inner phase was identified by exposing the phase-separated SOA+SOA particles  
267 to RH values between  $\sim 90\%$  to  $\sim 101\%$  and observing the growth of the individual phases resulting from uptake  
268 of water. The phase with the larger change in size was attributed to the SOA type with the larger O/C ratio, con-  
269 sistent with a higher hygroscopicity, which for the phase-separated SOA+SOA mixtures tested was always the  
270 inner phase.

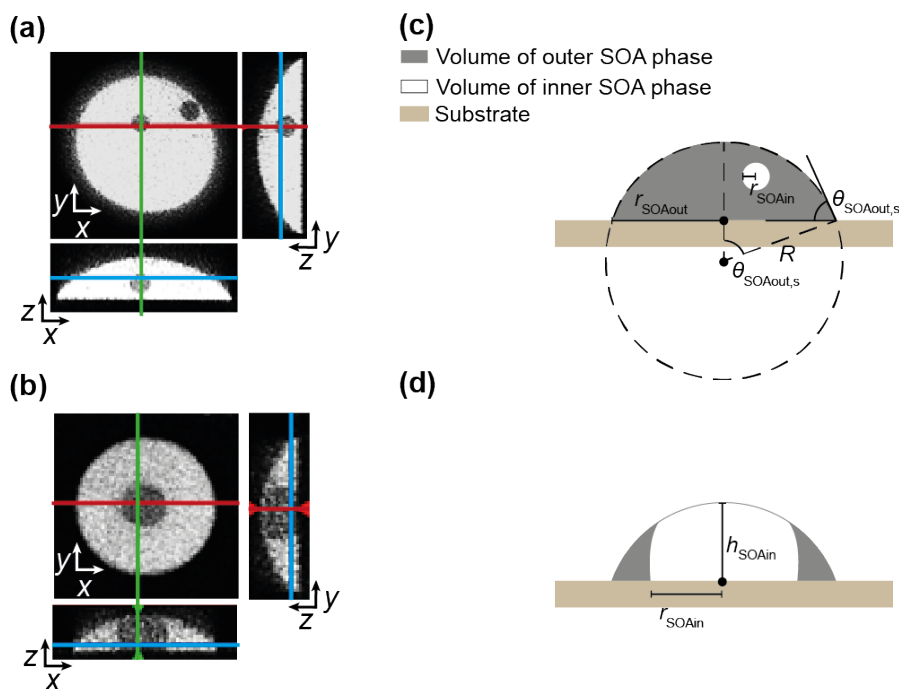

271

272 **Figure S3:** Example confocal microscopy images (a, b) and schematics illustrating the corresponding three-dimensional arrangements (c, d) of the two SOA phases within the deposited SOA+SOA particles for the two dominant arrangements observed in our experiments: (a, c) The inner SOA phase forming spheres within the outer phase having the shape of a spherical calotte and (b, d) the inner SOA phase forming a cylinder within the spherical calotte-shaped outer phase. In each confocal microscopy image, the coordinates are indicated by the arrows. Large top-down views show particles in the x-y plane. The smaller images at the bottom and right denote cross-sections along the green (x-z plane) and red (y-z plane) lines. The blue lines within the vertical cross sections indicate the focal plane corresponding to the x-y plane of the top-down image depicted.

279 **Table S5:** Overview of experiments where the consecutive generation and impaction method was used for the generation of SOA+SOA particles and phase separated particles were observed between relative humidities of 90% to 0%. Tabulated are the experiment number and the average (minimum/maximum) SOA-to-SOA (volume) mixing ratios estimated from the confocal microscopy analysis, given as  $V_{SOAIN}/V_{SOAOUT}$ , where the inner phase corresponds to the SOA phase with the higher O/C ratio. Also indicated in parenthesis are the number of individual two-phase SOA+SOA particles corresponding to each of the two morphology types based on the confocal microscopy analysis (Fig. S3).

| Exp. No. | SOA <sub>1</sub>                      | SOA <sub>2</sub>        | Avg. (min/max) $V_{SOAIN}/V_{SOAOUT}$ volume ratio | Number of particles with morphology as in Fig. S3a | Number of particles with morphology as in Fig. S3b |
|----------|---------------------------------------|-------------------------|----------------------------------------------------|----------------------------------------------------|----------------------------------------------------|
| 6        | $\beta$ -caryophyllene/O <sub>3</sub> | Toluene/OH              | 0.231 (0.012/0.68)                                 | 3                                                  | 5                                                  |
| 9        | Farnesene/O <sub>3</sub>              | Catechol/O <sub>3</sub> | 0.563 (0.201/0.954)                                | 0                                                  | 8                                                  |
| 10       | Farnesene/O <sub>3</sub>              | Toluene/OH              | 0.581 (0.181/0.867)                                | 0                                                  | 8                                                  |
| 14       | Valencene/O <sub>3</sub>              | Catechol/O <sub>3</sub> | 0.065 (0.001/0.4)                                  | 6                                                  | 2                                                  |
| 15       | Valencene/O <sub>3</sub>              | Toluene/OH              | 0.492 (0.001/0.806)                                | 3                                                  | 5                                                  |

## 285 S4.2 Estimation of SOA-to-SOA mixing ratio for simultaneous generation and impaction method experiments

287 For the mixtures generated using the simultaneous generation and impaction method, another approach was used to estimate the individual contribution of each SOA type within internally mixed SOA+SOA particles. As described in Section S2.2, the particle mass loadings of each SOA type were sampled individually at the beginning and end of each experiment when only one of the SOA types was present within the UBC-EC (Fig. S1). The SOA-to-SOA mass mixing ratio was then simply estimated from the ratio of the average organic mass concentrations when only either one of the SOA types was present within the UBC-EC. The resulting SOA-to-SOA mixing ratios along with the average organic mass concentrations of the individual SOA types before and after each mixing experiment are summarized in Table S6. Also tabulated for comparison are the total organic mass concentrations measured when both SOA types were present within the environmental chamber. Using the OPC mass loadings to estimate the SOA-to-SOA mixing ratios has the advantage that mixing ratios can also be estimated for mixtures

297 that resulted in single-phase particles. At the same time, this approach neglects possible SOA mass enhancement  
 298 and associated changes in mixing ratio. Therefore, we acknowledge that the mixing ratios estimated here represent  
 299 first-order approximations of the true SOA-to-SOA mixing ratios.

300 **Table S6:** Overview of experiments where the simultaneous generation and impaction method was used for the generation of  
 301 SOA+SOA particles. Tabulated are the experiment number and the different SOA types, along with the average organic particle  
 302 mass loadings for periods when only one SOA type was present within the chamber and for periods when two SOA types were  
 303 simultaneously present within the chamber. Also listed is the SOA-to-SOA volume mixing ratio estimated as the ratio of the  
 304 average OPC-based mass loadings before and after an experiment when only SOA<sub>1</sub> or only SOA<sub>2</sub> were present within the  
 305 chamber and assuming the same density for both SOA types. The values in parenthesis indicate the standard error of the mass  
 306 loading, given as two standard deviations.

| Exp. No. | SOA <sub>1</sub>                | SOA <sub>2</sub>                      | Avg SOA <sub>1</sub> mass concentration / $\mu\text{g m}^{-3}$ | Avg SOA <sub>2</sub> mass concentration / $\mu\text{g m}^{-3}$ | Avg. total organic aerosol mass when both SOA types are present within EC-UBC / $\mu\text{g m}^{-3}$ | Avg. based estimated SOA <sub>1</sub> -to-SOA <sub>2</sub> volume mixing ratio |
|----------|---------------------------------|---------------------------------------|----------------------------------------------------------------|----------------------------------------------------------------|------------------------------------------------------------------------------------------------------|--------------------------------------------------------------------------------|
| 1        | $\alpha$ -pinene/O <sub>3</sub> | $\beta$ -caryophyllene/O <sub>3</sub> | 34 $\pm$ 0.35*                                                 | 43 $\pm$ 7.4                                                   | 89 $\pm$ 7.9                                                                                         | 0.79                                                                           |
| 3        | $\alpha$ -pinene/O <sub>3</sub> | Catechol/O <sub>3</sub>               | 41 $\pm$ 14.3                                                  | 41 $\pm$ 14.5                                                  | 91 $\pm$ 22.9                                                                                        | 1                                                                              |
| 4        | Catechol/O <sub>3</sub>         | $\beta$ -caryophyllene/O <sub>3</sub> | 42 $\pm$ 12.8                                                  | 39 $\pm$ 12.1                                                  | 93 $\pm$ 5.0                                                                                         | 1.08                                                                           |

307 \* sampling time for pure  $\alpha$ -pinene SOA was  $\sim$ 10 min

### 308 S5 Experimental setup used to determine elemental ratios for SOA from wash off solutions

309 Chemical characterization of the different SOA types was performed by AMS measurements. For the SOA types  
 310 generated in the UBC-EC and UBC-OFR, the aerosol particles were directly sampled in-situ from the respective  
 311 environmental reactor with the AMS. To characterize the toluene SOA material generated in the HU-OFR using  
 312 the same AMS instrument, toluene SOA material was first collected onto substrates and shipped to the University  
 313 of British Columbia (UBC). At UBC, the toluene SOA material was extracted into an aqueous solution, and then  
 314 the SOA material was re-aerosolized from the aqueous solution and sampled by an AMS. This method was vali-  
 315 dated using SOA generated from catechol ozonolysis within the UBC-EC.

316 To this end, SOA material was first collected onto glass slides from a given environmental reactor as described in  
 317 Section S2. For typical collection times of  $\sim$ 24 h and our experimental conditions, this resulted in approximately  
 318 1 mg of a given SOA type impacted onto an individual 12 mm diameter glass slide. To extract the SOA material,  
 319 a glass slides was then placed into a sterile, conical-bottom centrifuge tube (Cole-Parmer, UNP10404-CP), and 3  
 320 ml of high-performance liquid chromatography water (HPLC; Millipore Sigma, HPLC water Plus,  $\leq$  0.0003%  
 321 non-volatile impurities,  $\leq$  7 ppb total organic carbon) were added to each tube. The tubes were then placed onto a  
 322 shaker (New Brunswick Scientific, C2 Platform Shaker Classic Series) operated at 200 rpm for 60 min. The  
 323 extracts were then used without further filtration and aerosolized using an atomizer setup. Specifically, the aqueous  
 324 solutions were nebulized using a TROPOS-atomizer, fed through a custom-built diffusion drier containing molec-  
 325 ular sieve (Millipore Sigma, sodium and aluminosilicate, A-type crystal structure, 4 Å pore diameter), and then  
 326 passed into a  $\sim$ 20 L glass mixing volume. The atomizer was operated at a total flow rate of 3.0 L min<sup>-1</sup>, using  
 327 nitrogen (Linde, 5.0 grade) as a carrier gas. The total flow rate into the atomizer is given by the sum of the orifice  
 328 and the dilution flow rates, whose ratio was manually adjusted using a needle valve to achieve typical dripping  
 329 rates of  $\sim$ 1 Hz. The aerosols were directly sampled by the AMS from the mixing volume and AMS data was  
 330 analyzed in an identical fashion as described in the main text. To correct for gas-phase interference, samples were  
 331 also collected by the AMS for a period of 5-10 min with a particle filter (Whatman, 1851-047, grade QM-A)  
 332 located before the AMS. The excess flow of the mixing volume was filtered (Pall Inc., HEPA filter) and exhausted  
 333 into the laboratory. The RH of the exhaust was measured in-situ using a humidity sensor (Vaisala, HMT120/130)  
 334 and was around 5% for our experimental conditions. In between different wash off experiments using the same  
 335 SOA type, the atomizer was rinsed by running it with pure Milli-Q water (18.2 M $\Omega$ .cm) for  $\sim$ 10 min, and the  
 336 mixing volume was purged with filtered (Pall Inc., HEPA filter) compressed air, using a flow rate of  $\sim$ 10 L min<sup>-1</sup>,  
 337 until the particle counts on the CPC were zero. In between different wash off experiments using different SOA  
 338 types, the atomizer and mixing volume were completely washed with acetone and ethyl acetate, followed by Milli-  
 339 Q water.

340 In Table S7 we list the average O/C ratios determined for the different SOA samples using the wash off approach,  
 341 as described above. Also tabulated -where available- is the average O/C ratio obtained when sampling the SOA  
 342 particles in-situ from the environmental reactor. For catechol SOA, we found good comparability for the O/C ratios  
 343 determined in-situ and for the washed-off samples. Thus, the average O/C ratios from both sampling methods were  
 344 within experimental uncertainty. We point out that the catechol in-situ samples used for this comparison were  
 345 probed throughout the same period when the SOA material for the corresponding wash-off experiments was col-  
 346 lected, to ensure that the same aerosol population was probed with either approach. Based on the good agreement  
 347 of the O/C ratios determined for the in-situ and the wash-off catechol SOA experiments, we expect our wash-off  
 348 method to provide reasonable O/C ratios for highly oxidized SOA material that has similar or larger O/C ratios to  
 349 the catechol ozonolysis SOA tested here, i.e., SOA material that is expected to be largely water soluble. Applying  
 350 this method to SOA material generated from toluene photooxidation within the OFR-HU, we find an average O/C  
 351 ratio of  $1.05 \pm 0.13$ . Here, we used this O/C ratio for analysis of the phase behavior of SOA+SOA mixtures con-  
 352 taining toluene SOA.

353 To further test the validity of our wash-off experiments we used a scanning particle mobility analyzer, consisting  
 354 of a differential mobility analyzer (DMA, TSI Inc., Classifier model 3080, with 3081 column and Krypton radiation  
 355 source) and a condensation particle counter (CPC, TSI Inc., model 3776 operated in low flow mode), operated  
 356 at an aerosol-to-sheath flow ratio of 1/10, to continuously sample particles from the mixing volume throughout a  
 357 wash off experiment. In Fig. S4 we show the volume size distributions corresponding to the samples tabulated in  
 358 Table S7. The overlapping volume distributions for a given SOA type reveal good reproducibility of our wash off  
 359 experiments. Also shown in Fig. S4 is the distribution obtained when atomizing pure HPLC water, as a reference  
 360 blank. The volume distribution of the pure HPLC water shows no clear mode, but only a few counts around diam-  
 361 eters around 300 nm in diameter. This is expected, given the high purity of the water used as solvent. By contrast  
 362 the volume distributions of the SOA wash offs show clear mode diameters between approximately 110 nm to 170  
 363 nm. This verifies that the signal results from the dissolved organic material rather than from impurities in the  
 364 solution.

365 **Table S7.** Comparison of O/C ratio of SOA samples, when using the AMS to directly sample the aerosol particles in-situ from  
 366 the environmental reactor and when sampling aerosol particles collected from the environmental reactor that have been re-  
 367 aerosolized from an aqueous solution (wash off), as described in the text. All O/C ratios were determined based in V-mode  
 368 AMS data and applying the improved ambient method(Canagaratna et al., 2015; Aiken et al., 2008). Tabulated are the average  
 369 O/C ratios for each sample along with the uncertainty (12% relative error), associated with the improved ambient method  
 370 applied to a multi-species organic mixture ( $\geq 25$  species)(Canagaratna et al., 2015). Also indicated in parenthesis is the range  
 371 over which the average O/C ratios varied throughout the sampling period. N/A denotes values that are not available.

| SOA sample                                                                           | O/C ratio when sampling in-situ   | O/C ratio when sampling wash-off  |
|--------------------------------------------------------------------------------------|-----------------------------------|-----------------------------------|
| Catechol/O3<br>(20220326_162300_EC; collected on sili-<br>conized glass slide)       | $0.98 \pm 0.12$<br>(0.97 to 1.0)  | $0.97 \pm 0.12$<br>(0.94 to 1.01) |
| Catechol/O3<br>(20220327_152600_EC; collected on sili-<br>conized glass slide)       | $0.95 \pm 0.11$<br>(0.93 to 0.97) | $1.0 \pm 0.12$<br>(0.97 to 1.03)  |
| Catechol/O3<br>(20220403_141000_EC; collected on sili-<br>conized glass slide)       | $0.94 \pm 0.11$<br>(0.93 to 0.96) | $0.90 \pm 0.11$<br>(0.88 to 0.94) |
| Catechol/O3<br>(20220404_125600_EC; collected on sili-<br>conized glass slide)       | $0.94 \pm 0.11$<br>(0.92 to 0.96) | $0.92 \pm 0.11$<br>(0.85 to 0.95) |
| Toluene/OH<br>(Sample #1, 2021_OFH-HU; collected on<br>fluorinated glass slide)      | N/A                               | $1.04 \pm 0.12$<br>(1.01 to 1.06) |
| Toluene/OH<br>(Sample #2, 2021_OFH-HU; collected on<br>fluorinated glass slide)      | N/A                               | $1.07 \pm 0.13$<br>(1.06 to 1.08) |
| Toluene/OH<br>(Sample #10, 20220305_OFH-HU; collected<br>on siliconized glass slide) | N/A                               | $1.05 \pm 0.13$<br>(0.95 to 1.29) |
| Toluene/OH<br>(Sample #7, 20220222_OFH-HU; collected<br>on siliconized glass slide)  | N/A                               | $1.07 \pm 0.13$<br>(0.95 to 1.14) |

|                                                                                     |     |                                   |
|-------------------------------------------------------------------------------------|-----|-----------------------------------|
| Toluene/OH<br>(Sample #2, 20220217_OFR-HU; collected<br>on siliconized glass slide) | N/A | $1.00 \pm 0.12$<br>(0.73 to 1.09) |
|-------------------------------------------------------------------------------------|-----|-----------------------------------|

372

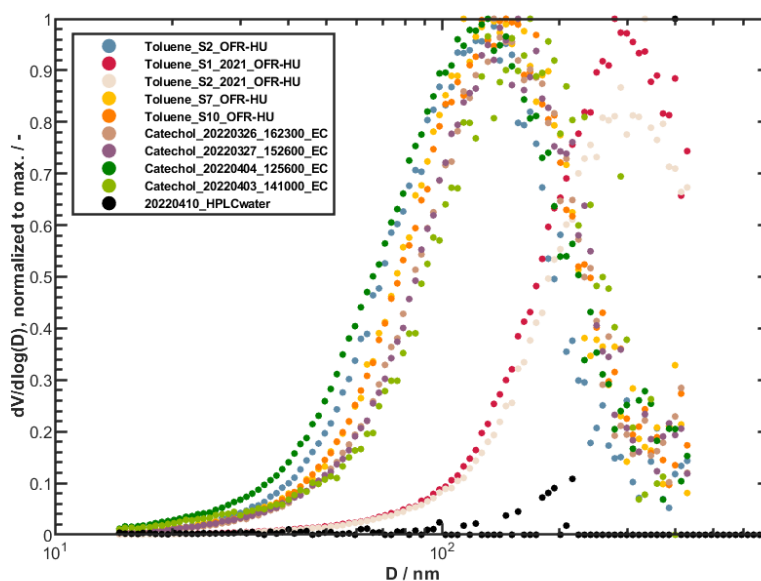

373

374

**Figure S4:** Volume size distributions of the re-aerosolized SOA wash off solutions, as measured by a scanning particle mobility analyzer by sampling from the mixing volume. See text for details.

375

376

377 S6 Phase behavior of pure SOA materials

(a) Valencene/O<sub>3</sub> SOA (O/C = 0.34)

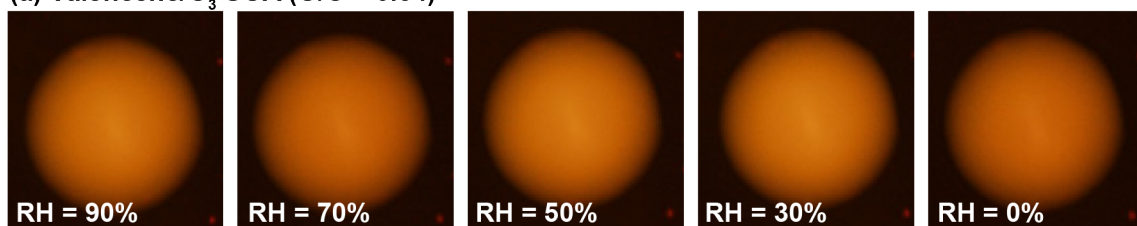

(b)  $\beta$ -caryophyllene/O<sub>3</sub> SOA (O/C = 0.40)

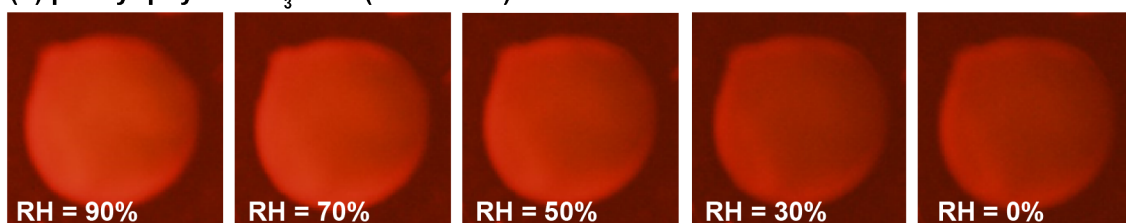

(c) Farnesene/O<sub>3</sub> SOA (O/C = 0.34)

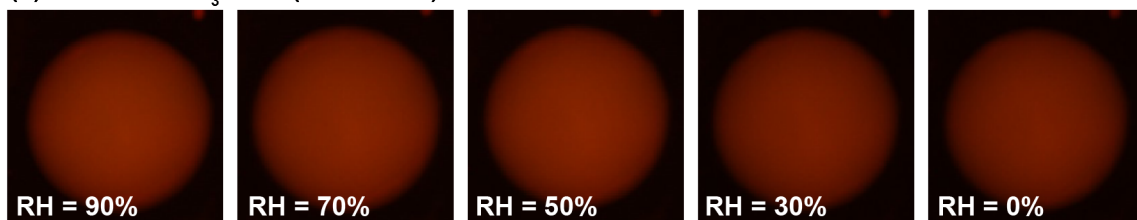

(d)  $\alpha$ -pinene/O<sub>3</sub> SOA (O/C = 0.50)

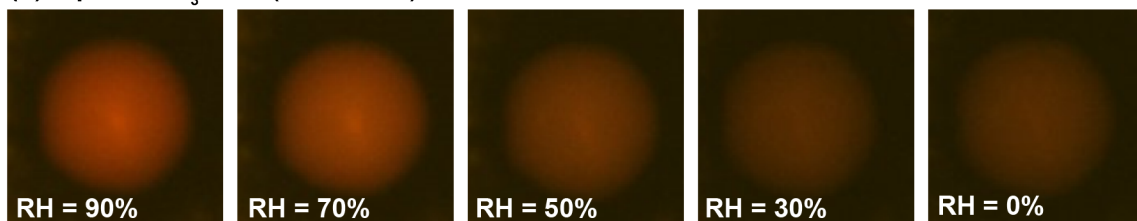

(e) Catechol/O<sub>3</sub> SOA (O/C = 0.88)

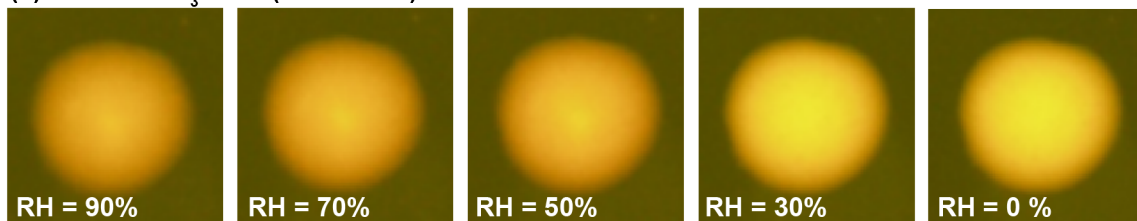

(f) Toluene/OH SOA (O/C = 1.05)

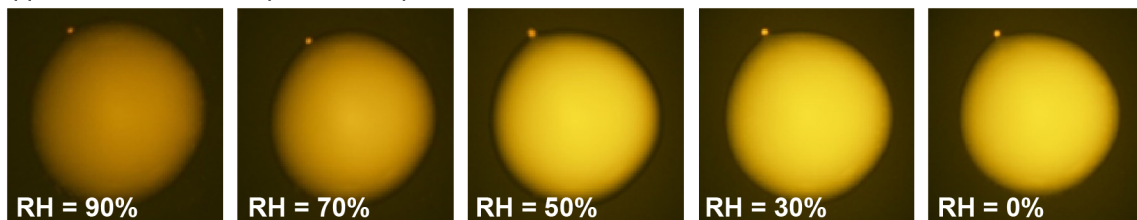

378  
379 **Figure S5:** Fluorescence microscopy images of the individual, unmixed secondary organic aerosol (SOA) materials. The SOA  
380 type is indicated on top of each row along with its average elemental oxygen-to-carbon (O/C) ratio. The different panels cor-  
381 respond to different relative humidity (RH) values as indicated. The fluorescence color is due to trace amounts of Nile red  
382 embedded within the SOA particles.

383 **S7 Phase behavior of internal SOA+SOA mixtures**

384 Shown in the following are the fluorescence microscopy experiments for all the SOA+SOA mixtures studied here.  
385 The organization of Fig. S6 to Fig. S10 follows that of the mixing matrix shown in Fig. 2a of the main text, with  
386 each Figs. S6–S10 corresponding to one column of Fig. 2a.

(a) Valencene/O<sub>3</sub> SOA (O/C = 0.34) + β-caryophyllene/O<sub>3</sub> SOA (O/C = 0.40)

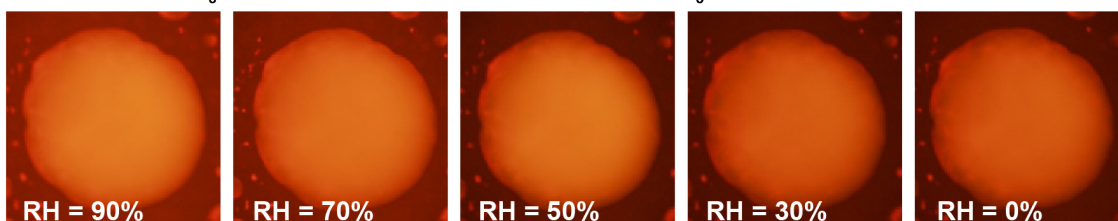

(b) Valencene/O<sub>3</sub> SOA (O/C = 0.34) + farnesene/O<sub>3</sub> SOA (O/C = 0.41)

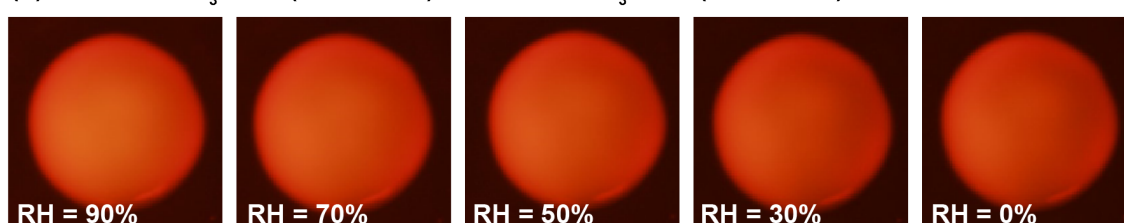

(c) Valencene/O<sub>3</sub> SOA (O/C = 0.34) + α-pinene/O<sub>3</sub> SOA (O/C = 0.50)

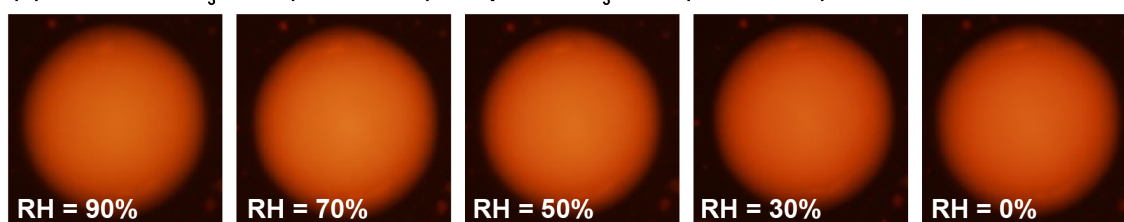

(d) Valencene/O<sub>3</sub> SOA (O/C = 0.34) + catechol/O<sub>3</sub> SOA (O/C = 0.88)

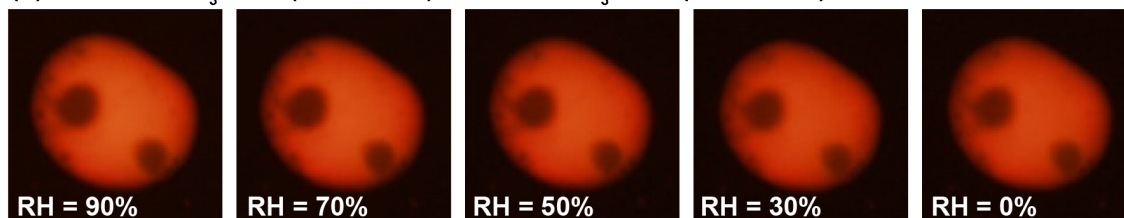

(e) Valencene/O<sub>3</sub> SOA (O/C = 0.34) + toluene/OH SOA (O/C = 1.05)

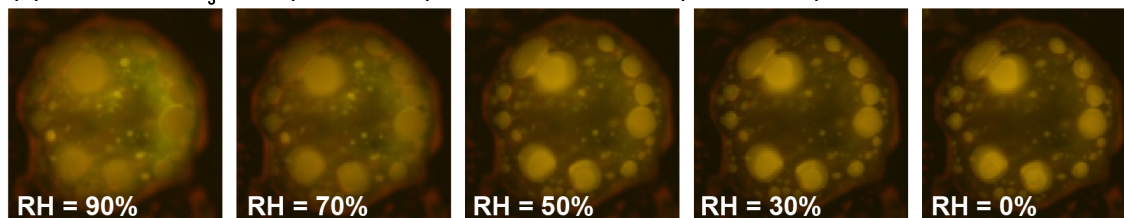

387

388 **Figure S6:** Fluorescence microscopy images of mixtures of secondary organic aerosol (SOA) material derived from valen-  
389 cene ozonolysis with other SOA types. The components of each mixture are given above each row together with the average  
390 elemental oxygen-to-carbon (O/C) ratio of the SOA type. The different panels correspond to different relative humidity (RH)  
391 values as indicated. The fluorescence color is due to trace amounts of Nile red embedded within the SOA+SOA particles.



(a)  $\beta$ -caryophyllene/ $O_3$  SOA (O/C = 0.40) + farnesene/ $O_3$  SOA (O/C = 0.41)

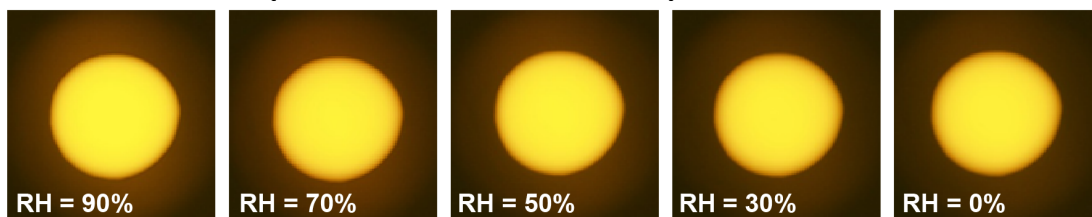

(b)  $\beta$ -caryophyllene/ $O_3$  SOA (O/C = 0.40) +  $\alpha$ -pinene/ $O_3$  SOA (O/C = 0.50)

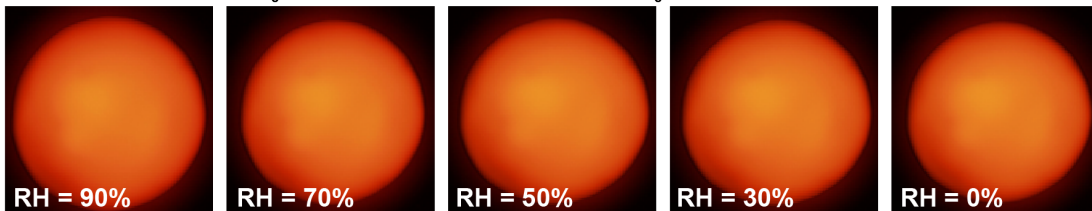

(c)  $\beta$ -caryophyllene/ $O_3$  SOA (O/C = 0.40) + catechol/ $O_3$  SOA (O/C = 0.88)

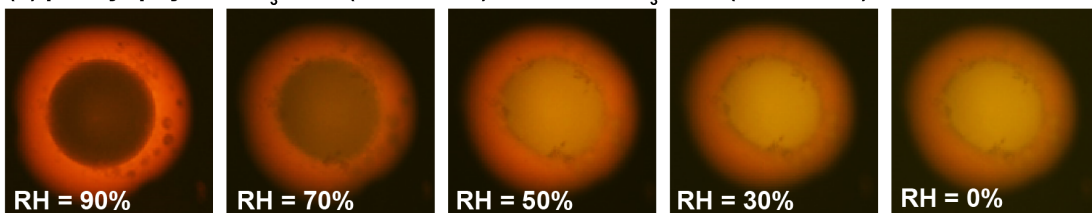

(d)  $\beta$ -caryophyllene/ $O_3$  SOA (O/C = 0.40) + toluene/OH SOA (O/C = 1.05)

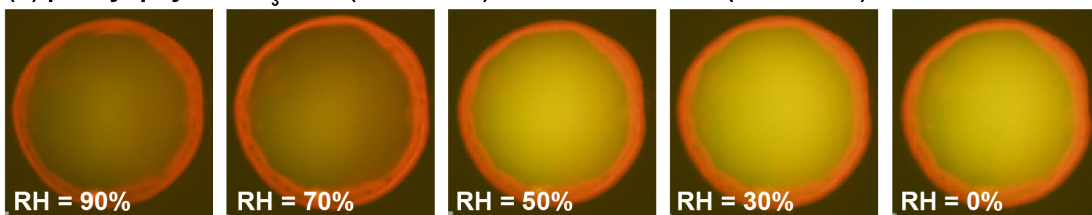

392

393 **Figure S7:** Fluorescence microscopy images of mixtures of secondary organic aerosol (SOA) material derived from  $\beta$ -caryo-  
394 phyllene ozonolysis with other SOA types. The components of each mixture are given above each row together with the aver-  
395 age elemental oxygen-to-carbon (O/C) ratio of the SOA type. The different panels correspond to different relative humidity  
396 (RH) values as indicated. The fluorescence color is due to trace amounts of Nile red embedded within the SOA+SOA parti-  
397 cles.

(a) Farnesene/O<sub>3</sub> SOA (O/C = 0.41) +  $\alpha$ -pinene/O<sub>3</sub> SOA (O/C = 0.50)

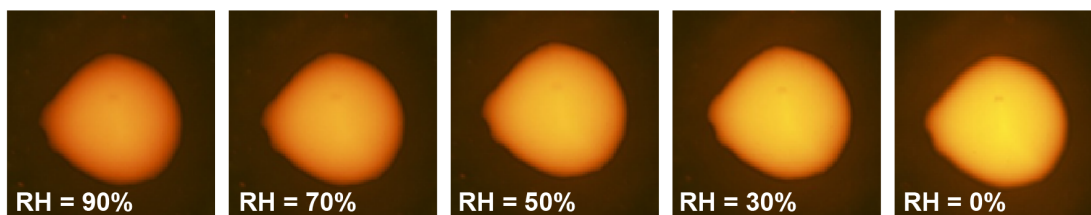

(b) Farnesene/O<sub>3</sub> SOA (O/C = 0.41) + catechol/O<sub>3</sub> SOA (O/C = 0.88)

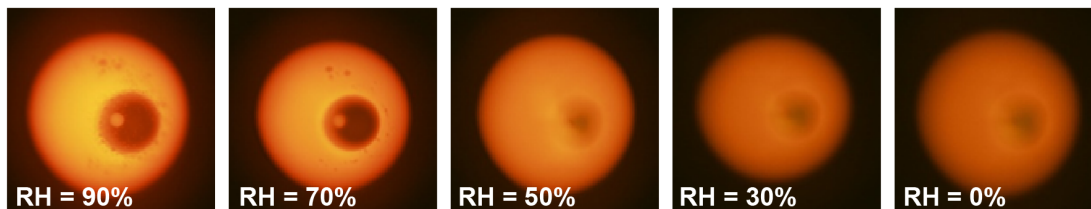

(c) Farnesene/O<sub>3</sub> SOA (O/C = 0.41) + toluene/OH SOA (O/C = 1.05)

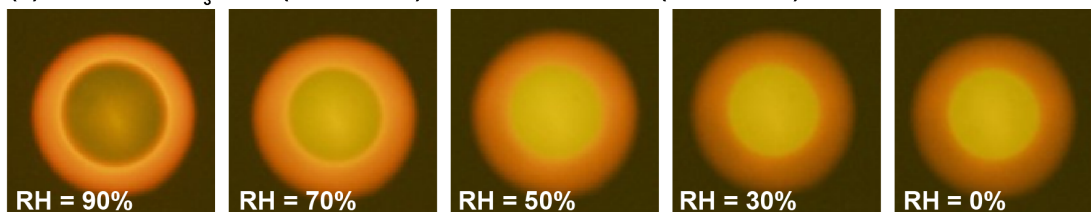

398  
399  
400  
401  
402  
403

**Figure S8:** Fluorescence microscopy images of mixtures of secondary organic aerosol (SOA) material derived from farnesene ozonolysis with other SOA types. The components of each mixture are given above each row together with the average elemental oxygen-to-carbon (O/C) ratio of the SOA type. The different panels correspond to different relative humidity (RH) values as indicated. The fluorescence color is due to trace amounts of Nile red embedded within the SOA+SOA particles.

(a)  $\alpha$ -pinene/O<sub>3</sub> SOA (O/C = 0.50) + catechol/O<sub>3</sub> SOA (O/C = 0.88)

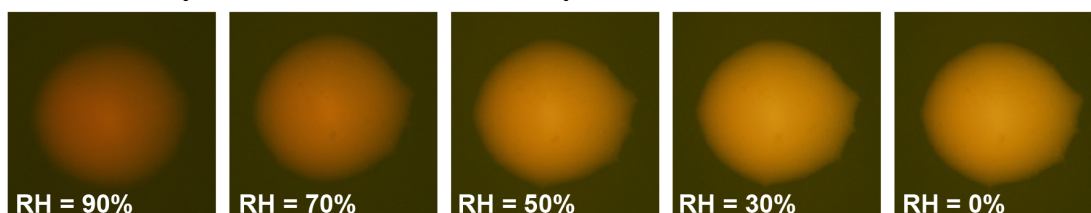

(b)  $\alpha$ -pinene/O<sub>3</sub> SOA (O/C = 0.50) + toluene/OH SOA (O/C = 1.05)

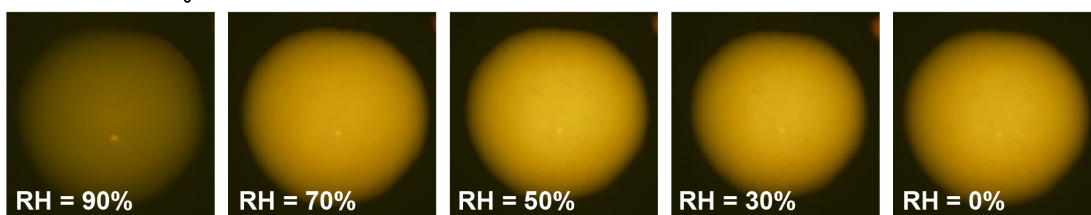

404  
405  
406  
407  
408

**Figure S9:** Fluorescence microscopy images of mixtures of secondary organic aerosol (SOA) material derived from  $\alpha$ -pinene ozonolysis with other SOA types. The components of each mixture are given above each row together with the average elemental oxygen-to-carbon (O/C) ratio of the SOA type. The different panels correspond to different relative humidity (RH) values as indicated. The fluorescence color is due to trace amounts of Nile red embedded within the SOA+SOA particles.

(a) Catechol/O<sub>3</sub> SOA (O/C = 0.88) + toluene/OH SOA (O/C = 1.05)

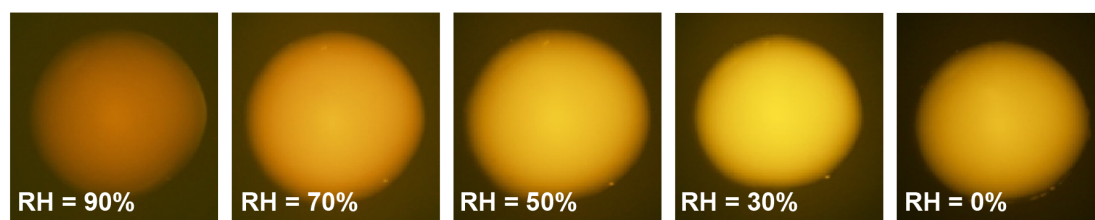

409  
410  
411  
412  
413

**Figure S10:** Fluorescence microscopy images of mixtures of secondary organic aerosol (SOA) material derived from catechol ozonolysis with SOA material derived from toluene photooxidation. Also indicated are the average elemental oxygen-to-carbon (O/C) ratio of the SOA types. The different panels correspond to different relative humidity (RH) values as indicated. The fluorescence color is due to trace amounts of Nile red embedded within the SOA+SOA particles.

414 **S8 Phase behavior in SOA particles generated from oxidation of precursor gases emitted from real pine**  
415 **trees**

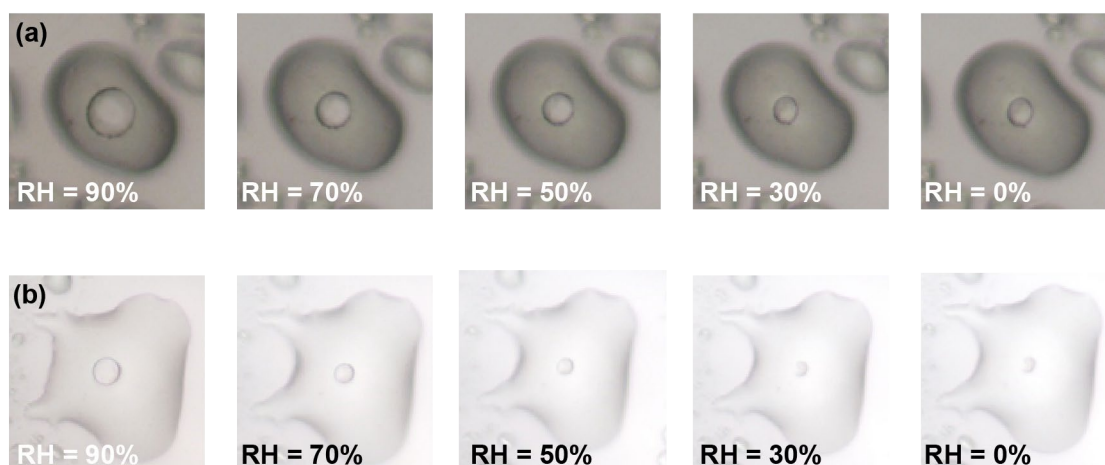

416  
417 **Figure S11:** Optical microscope images at different relative humidity (RH) values of SOA material derived from photooxida-  
418 tion of gases emitted from real trees, as described in Smith et al. (in prep.). The images shown in panel (a) and (b) correspond  
419 to samples TB2\_20210725 and TA3\_20210706, respectively, as described by Smith et al. (in prep.).  
420

421 **S9 Phase behavior of SOA+SOA using descriptors beyond  $\Delta(O/C)$**

422 While the description of the SOA+SOA phase behavior in terms of the  $\Delta(O/C)$  value captures the number of phases  
423 for most of the mixtures studied here, the inclusion of other parameters in addition to the  $\Delta(O/C)$  value could  
424 further improve the accuracy of such predictions. For example, the evolution of organic aerosol particles along  
425 atmospheric aging trajectories is often described by Van Krevelen diagrams, where the aerosol is described in  
426 terms of the O/C ratio and the elemental hydrogen-to-carbon (H/C) ratio (e.g. Heald et al., 2010). Using infor-  
427 mation on the H/C ratio of the SOA types studied here, determined by our AMS measurements (Table S3), and  
428 describing the number of phase in terms of both the  $\Delta(O/C)$  and the  $\Delta(H/C)$ , however, did not lead to a much  
429 clearer separation of SOA+SOA mixtures that formed one- and two-phase particles (Fig. S12). Nonetheless, other  
430 parameters such as the Hansen solubility parameter that include more chemical information than O/C and H/C  
431 ratios (Hansen, 2007) could improve the predictability of the number of phases (Ye et al., 2018a, c). At the same  
432 time, the Hansen solubility parameter cannot easily be determined for ambient samples, comes at the cost of adding  
433 complexity to the predictive framework, and, as such, is beyond the scope of this study. Another option is to use  
434 a more complex thermodynamic model, such as the Aerosol Inorganic–Organic Mixtures Functional Groups Ac-  
435 tivity Coefficients (AIOMFAC) thermodynamic model together with its phase separation extension (Zuend et al.,  
436 2008, 2010; Zuend and Seinfeld, 2013). Such a model could predict the number of phases as well as partially  
437 solubility of the components. However, similar to the Hansen solubility parameter, it cannot easily be determined  
438 for ambient samples.

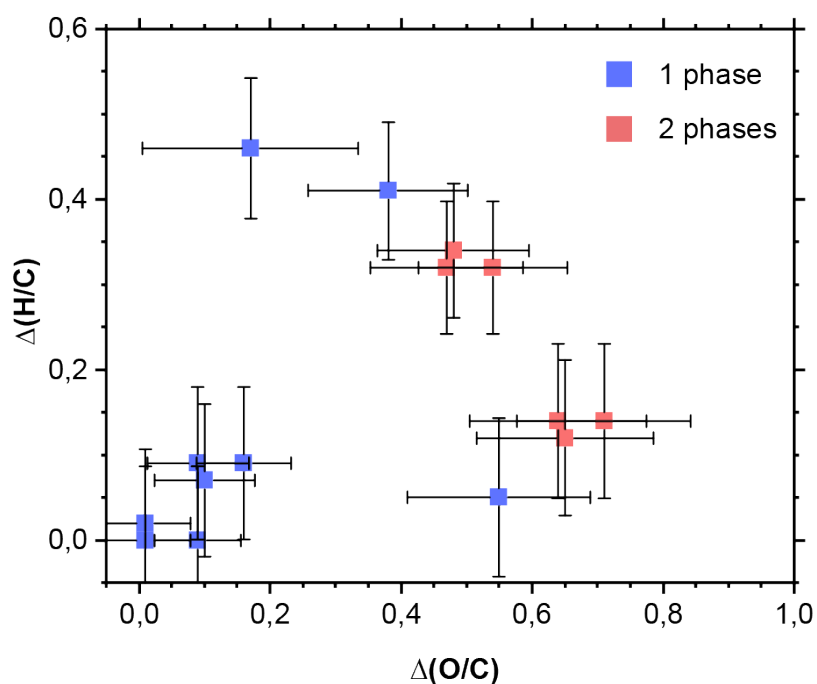

439

440 **Figure S12:** Summary of the number of phases observed in our internally mixed SOA+SOA particles as a function of the  
 441 absolute difference in the average O/C ratios between the two SOA types within a mixture,  $\Delta(O/C) = |O/C_{SOA1} - O/C_{SOA2}|$  and  
 442 the absolute difference in the average H/C ratios between the two SOA types within a mixture,  $\Delta(H/C) = |H/C_{SOA1} - H/C_{SOA2}|$ .  
 443 The horizontal error bars indicate the propagated error from the 12% relative uncertainty of the O/C ratios determined for each  
 444 SOA type and the vertical error bars indicate the propagated error from the 4% relative uncertainty of the H/C ratios determined  
 445 for each SOA type (Table S3).

446 **Reference**

- 447 Aiken, A. C., Decarlo, P. F., Kroll, J. H., Worsnop, D. R., Huffman, J. A., Docherty, K. S.,  
448 Ulbrich, I. M., Mohr, C., Kimmel, J. R., Sueper, D., Sun, Y., Zhang, Q., Trimborn, A., North-  
449 way, M., Ziemann, P. J., Canagaratna, M. R., Onasch, T. B., Alfarra, M. R., Prevot, A. S. H.,  
450 Dommen, J., Duplissy, J., Metzger, A., Baltensperger, U., and Jimenez, J. L.: O/C and  
451 OM/OC ratios of primary, secondary, and ambient organic aerosols with high-resolution time-  
452 of-flight aerosol mass spectrometry, 42, 4478–4485, <https://doi.org/10.1021/es703009q>, 2008.
- 453 Canagaratna, M. R., Jimenez, J. L., Kroll, J. H., Chen, Q., Kessler, S. H., Massoli, P., Hilde-  
454 brandt Ruiz, L., Fortner, E., Williams, L. R., Wilson, K. R., Surratt, J. D., Donahue, N. M.,  
455 Jayne, J. T., and Worsnop, D. R.: Elemental ratio measurements of organic compounds using  
456 aerosol mass spectrometry: characterization, improved calibration, and implications, 15, 253–  
457 272, <https://doi.org/10.5194/acp-15-253-2015>, 2015.
- 458 Chesna, J. W., Wiedmaier, B. F., Wang, J., Samara, A., Leach, R. K., Her, T.-H., and Smith,  
459 S. T.: Aerial wetting contact angle measurement using confocal microscopy, *Meas. Sci. Tech-*  
460 *no.*, 27, 125202, <https://doi.org/10.1088/0957-0233/27/12/125202>, 2016.
- 461 Docherty, K. S. and Ziemann, P. J.: Effects of Stabilized Criegee Intermediate and OH Radi-  
462 cal Scavengers on Aerosol Formation from Reactions of  $\beta$ -Pinene with O<sub>3</sub>, 37, 877–891,  
463 <https://doi.org/10.1080/02786820300930>, 2003.
- 464 Dommen, J., Hellén, H., Saurer, M., Jaeggi, M., Siegwolf, R., Metzger, A., Duplissy, J., Fierz,  
465 M., and Baltensperger, U.: Determination of the Aerosol Yield of Isoprene in the Presence of  
466 an Organic Seed with Carbon Isotope Analysis, *Environ. Sci. Technol.*, 43, 6697–6702,  
467 <https://doi.org/10.1021/es9006959>, 2009.
- 468 Gordon, C. A., Ye, J., and Arthur W.H., C.: Secondary Organic Aerosol Formation Enhanced  
469 by Organic Seeds of Similar Polarity at Atmospherically Relative Humidity,  
470 <https://doi.org/10.17975/sfj-2015-009>, 2016.
- 471 Gorkowski, K., Donahue, N. M., and Sullivan, R. C.: Emulsified and Liquid–Liquid Phase-  
472 Separated States of  $\alpha$ -Pinene Secondary Organic Aerosol Determined Using Aerosol Optical  
473 Tweezers, *Environ. Sci. Technol.*, 51, 12154–12163, <https://doi.org/10.1021/acs.est.7b03250>,  
474 2017.
- 475 Gorkowski, K., Donahue, N. M., and Sullivan, R. C.: Aerosol Optical Tweezers Constrain the  
476 Morphology Evolution of Liquid-Liquid Phase-Separated Atmospheric Particles, *Chem*, 6,  
477 204–220, <https://doi.org/10.1016/j.chempr.2019.10.018>, 2020.
- 478 Hansen, C. M.: Hansen Solubility Parameters: A User’s Handbook, Second Edition, Second  
479 Edition., CRC Press, 544 pp., 2007.
- 480 Heald, C. L., Kroll, J. H., Jimenez, J. L., Docherty, K. S., DeCarlo, P. F., Aiken, A. C., Chen,  
481 Q., Martin, S. T., Farmer, D. K., and Artaxo, P.: A simplified description of the evolution of  
482 organic aerosol composition in the atmosphere, 37, <https://doi.org/10.1029/2010GL042737>,  
483 2010.
- 484 Hildebrandt, L., Henry, K. M., Kroll, J. H., Worsnop, D. R., Pandis, S. N., and Donahue, N.  
485 M.: Evaluating the Mixing of Organic Aerosol Components Using High-Resolution Aerosol

486 Mass Spectrometry, Environ. Sci. Technol., 45, 6329–6335,  
487 <https://doi.org/10.1021/es200825g>, 2011.

488 Huang, Y., Mahrt, F., Xu, S., Shiraiwa, M., Zuend, A., and Bertram, A. K.: Coexistence of  
489 three liquid phases in individual atmospheric aerosol particles, PNAS, 118,  
490 <https://doi.org/10.1073/pnas.2102512118>, 2021.

491 Iwamatsu, M.: A generalized Young's equation to bridge a gap between the experimentally  
492 measured and the theoretically calculated line tensions, 32, 2305–2319,  
493 <https://doi.org/10.1080/01694243.2018.1476036>, 2018.

494 Keywood, M. D., Kroll, J. H., Varutbangkul, V., Bahreini, R., Flagan, R. C., and Seinfeld, J.  
495 H.: Secondary Organic Aerosol Formation from Cyclohexene Ozonolysis: Effect of OH  
496 Scavenger and the Role of Radical Chemistry, Environ. Sci. Technol., 38, 3343–3350,  
497 <https://doi.org/10.1021/es049725j>, 2004.

498 Kim, D., Stevens, P. S., and Hites, R. A.: Rate Constants for the Gas-Phase Reactions of OH  
499 and O<sub>3</sub> with  $\beta$ -Ocimene,  $\beta$ -Myrcene, and  $\alpha$ - and  $\beta$ -Farnesene as a Function of Temperature, J.  
500 Phys. Chem. A, 115, 500–506, <https://doi.org/10.1021/jp111173s>, 2011.

501 King, S. M., Rosenoern, T., Shilling, J. E., Chen, Q., and Martin, S. T.: Increased cloud acti-  
502 vation potential of secondary organic aerosol for atmospheric mass loadings, 9, 2959–2971,  
503 <https://doi.org/10.5194/acp-9-2959-2009>, 2009.

504 Kroll, J. H., Donahue, N. M., Cee, V. J., Demerjian, K. L., and Anderson, J. G.: Gas-Phase  
505 Ozonolysis of Alkenes: Formation of OH from Anti Carbonyl Oxides, J. Am. Chem. Soc.,  
506 124, 8518–8519, <https://doi.org/10.1021/ja0266060>, 2002.

507 Liu, P. F., Abdelmalki, N., Hung, H.-M., Wang, Y., Brune, W. H., and Martin, S. T.: Ultravi-  
508 olet and visible complex refractive indices of secondary organic material produced by pho-  
509 tooxidation of the aromatic compounds toluene and *m*-xylene, 15, 1435–1446,  
510 <https://doi.org/10.5194/acp-15-1435-2015>, 2015.

511 Maclean, A. M., Smith, N. R., Li, Y., Huang, Y., Hettiyadura, A. P. S., Crescenzo, G. V., Shi-  
512 raiwa, M., Laskin, A., Nizkorodov, S. A., and Bertram, A. K.: Humidity-Dependent Viscosity  
513 of Secondary Organic Aerosol from Ozonolysis of  $\beta$ -Caryophyllene: Measurements, Predic-  
514 tions, and Implications, ACS Earth Space Chem., 5, 305–318,  
515 <https://doi.org/10.1021/acsearthspacechem.0c00296>, 2021.

516 Paulson, S. E., Chung, M. Y., and Hasson, A. S.: OH Radical Formation from the Gas-Phase  
517 Reaction of Ozone with Terminal Alkenes and the Relationship between Structure and Mech-  
518 anism, J. Phys. Chem. A, 103, 8125–8138, <https://doi.org/10.1021/jp991995e>, 1999.

519 Robinson, E. S., Saleh, R., and Donahue, N. M.: Organic Aerosol Mixing Observed by Sin-  
520 gle-Particle Mass Spectrometry, J. Phys. Chem. A, 117, 13935–13945,  
521 <https://doi.org/10.1021/jp405789t>, 2013.

522 Shilling, J. E., Chen, Q., King, S. M., Rosenoern, T., Kroll, J. H., Worsnop, D. R., McKinney,  
523 K. A., and Martin, S. T.: Particle mass yield in secondary organic aerosol formed by the dark  
524 ozonolysis of  $\alpha$ -pinene, 8, 2073–2088, <https://doi.org/10.5194/acp-8-2073-2008>, 2008.

525 Smith, N. R., Crescenzo, G. V., Faiola, C. L., Bertram, A. K., and Nizkorodov, S. A.: Effect  
526 of insect infestation on viscosity of Canary Island pine tree SOA, in prep.

527 Song, C., Zaveri, R. A., Shilling, J. E., Alexander, M. L., and Newburn, M.: Effect of Hydro-  
528 philic Organic Seed Aerosols on Secondary Organic Aerosol Formation from Ozonolysis of  
529  $\alpha$ -Pinene, *Environ. Sci. Technol.*, 45, 7323–7329, <https://doi.org/10.1021/es201225c>, 2011.

530 Song, M., Liu, P., Martin, S. T., and Bertram, A. K.: Liquid–liquid phase separation in parti-  
531 cles containing secondary organic material free of inorganic salts, 17, 11261–11271,  
532 <https://doi.org/10.5194/acp-17-11261-2017>, 2017.

533 Ye, J., Gordon, C. A., and Chan, A. W. H.: Enhancement in Secondary Organic Aerosol For-  
534 mation in the Presence of Preexisting Organic Particle, *Environ. Sci. Technol.*, 50, 3572–  
535 3579, <https://doi.org/10.1021/acs.est.5b05512>, 2016a.

536 Ye, J., Van Rooy, P., Adam, C. H., Jeong, C.-H., Urch, B., Cocker, D. R., Evans, G. J., and  
537 Chan, A. W. H.: Predicting Secondary Organic Aerosol Enhancement in the Presence of At-  
538 mospherically Relevant Organic Particles, *ACS Earth Space Chem.*, 2, 1035–1046,  
539 <https://doi.org/10.1021/acsearthspacechem.8b00093>, 2018a.

540 Ye, Q., Robinson, E. S., Ding, X., Ye, P. L., Sullivan, R. C., and Donahue, N. M.: Mixing of  
541 secondary organic aerosols versus relative humidity, 113, 12649–12654,  
542 <https://doi.org/10.1073/pnas.1604536113>, 2016b.

543 Ye, Q., Upshur, M. A., Robinson, E. S., Geiger, F. M., Sullivan, R. C., Thomson, R. J., and  
544 Donahue, N. M.: Following Particle-Particle Mixing in Atmospheric Secondary Organic Aer-  
545 osols by Using Isotopically Labeled Terpenes, 4, 318–333,  
546 <https://doi.org/10.1016/j.chempr.2017.12.008>, 2018b.

547 Ye, Q., Gu, P., Li, H. Z., Robinson, E. S., Lipsky, E., Kaltsonoudis, C., Lee, A. K. Y., Apte, J.  
548 S., Robinson, A. L., Sullivan, R. C., Presto, A. A., and Donahue, N. M.: Spatial Variability of  
549 Sources and Mixing State of Atmospheric Particles in a Metropolitan Area, *Environ. Sci.*  
550 *Technol.*, 52, 6807–6815, <https://doi.org/10.1021/acs.est.8b01011>, 2018c.

551 Yee, L. D., Isaacman-VanWertz, G., Wernis, R. A., Meng, M., Rivera, V., Kreisberg, N. M.,  
552 Hering, S. V., Bering, M. S., Glasius, M., Upshur, M. A., Gray Bé, A., Thomson, R. J., Gei-  
553 ger, F. M., Offenberg, J. H., Lewandowski, M., Kourtchev, I., Kalberer, M., de Sá, S., Martin,  
554 S. T., Alexander, M. L., Palm, B. B., Hu, W., Campuzano-Jost, P., Day, D. A., Jimenez, J. L.,  
555 Liu, Y., McKinney, K. A., Artaxo, P., Viegas, J., Manzi, A., Oliveira, M. B., de Souza, R.,  
556 Machado, L. A. T., Longo, K., and Goldstein, A. H.: Observations of sesquiterpenes and their  
557 oxidation products in central Amazonia during the wet and dry seasons, 18, 10433–10457,  
558 <https://doi.org/10.5194/acp-18-10433-2018>, 2018.

559 Zhang, X., Ortega, J., Huang, Y., Shertz, S., Tyndall, G. S., and Orlando, J. J.: A steady-state  
560 continuous flow chamber for the study of daytime and nighttime chemistry under atmospheri-  
561 cally relevant NO levels, 11, 2537–2551, <https://doi.org/10.5194/amt-11-2537-2018>, 2018.

562 Zuend, A. and Seinfeld, J. H.: A practical method for the calculation of liquid–liquid equilib-  
563 ria in multicomponent organic–water–electrolyte systems using physicochemical constraints,  
564 *Fluid Phase Equilibria*, 337, 201–213, <https://doi.org/10.1016/j.fluid.2012.09.034>, 2013.



565 Zuend, A., Marcolli, C., Luo, B. P., and Peter, T.: A thermodynamic model of mixed organic-  
566 inorganic aerosols to predict activity coefficients, 8, 4559–4593, [https://doi.org/10.5194/acp-](https://doi.org/10.5194/acp-8-4559-2008)  
567 8-4559-2008, 2008.

568 Zuend, A., Marcolli, C., Peter, T., and Seinfeld, J. H.: Computation of liquid-liquid equilibria  
569 and phase stabilities: implications for RH-dependent gas/particle partitioning of organic-inor-  
570 ganic aerosols, 10, 7795–7820, <https://doi.org/10.5194/acp-10-7795-2010>, 2010.

571
